# Supplementary material for: Inverse leidenfrost drop manipulation using menisci
Source: Royal Society of Chemistry journal article supplement (doi:10.1039/c9sm02363a), 2020-01-01
Supplement: c9sm02363a1.pdf [file c9sm02363a1.pdf]

### Supplementary Movies

**Supplementary Movie 1:** Trajectory of a silicone oil drop with radius  $R = 1.2$  mm deposited on a liquid nitrogen bath when approaching a wall. The drop is almost perfectly reflected, and bounces at a distance  $x_{\min} = 3.5$  mm from the wall. The movie is slowed down 5 times.

**Supplementary Movie 2:** A silicone oil drop with radius  $R = 900$   $\mu\text{m}$  is deposited into an aluminium channel with size  $d = 3$  mm, semi-immersed into the bath. The channel directs the drop and accelerates it when it exits.

**Supplementary Movie 3:** Reflection of a droplet with radius  $R = 830$   $\mu\text{m}$  by a parabolic wall, with focal length 5 cm. The droplet is initially directed towards the mirror using a channel, parallel to the axis of the mirror with width 3 mm. The movie is slowed down 2.5 times.
